1 **The human nose organoid respiratory virus model: an ex-vivo human challenge model to**  
2 **study RSV and SARS-CoV-2 pathogenesis and evaluate therapeutics.**

3 Anubama Rajan<sup>a</sup>, Ashley Morgan Weaver<sup>a\*</sup>, Gina Marie Aloisio<sup>a\*</sup>, Joseph Jelinski<sup>a</sup>, Hannah L.  
4 Johnson<sup>b</sup>, Susan F. Venable<sup>c</sup>, Trevor McBride<sup>a</sup>, Letisha Aideyan<sup>a</sup>, Felipe-Andrés Piedra<sup>a</sup>, Xunyan  
5 Ye<sup>a</sup>, Ernestina Melicoff-Portillo<sup>d</sup>, Malli Rama Kanthi Yerramilli<sup>a</sup>, Xi-Lei Zeng<sup>a</sup>, Michael A Mancini<sup>b</sup>,  
6 Fabio Stossi<sup>b</sup>, Anthony W. Maresso<sup>a</sup>, Shalaka A. Kotkar<sup>e</sup>, Mary K. Estes<sup>a, g</sup>, Sarah Blutt<sup>a</sup>, Vasanthi  
7 Avadhanula<sup>a</sup> and Pedro A. Piedra<sup>af#</sup>.

8 a Department of Molecular Virology and Microbiology, Baylor College of Medicine, Houston,  
9 Texas, USA

10 b Advanced Technology Cores, and Department of Molecular and Cellular Biology, Baylor College  
11 of Medicine, Houston, TX, USA

12 c Department of Pathology, Baylor College of Medicine, Houston, TX, USA

13 d Department of Pediatrics, Pulmonary Medicine Service, Baylor College of Medicine, Houston,  
14 TX USA

15 e Environmental Safety Department, Baylor College of Medicine, Houston, TX, USA

16 f Department of Pediatrics, Baylor College of Medicine, Houston, TX, US

17 g Department of Medicine, Infectious Diseases and Gastroenterology and Hepatology, Baylor  
18 College of Medicine, Houston, TX USA

19 \*Authors contributed equally.

20 # Address correspondence to Pedro A. Piedra, [ppiedra@bcm.edu](mailto:ppiedra@bcm.edu)

21

22 **Word count: 189/**

23 **Abstract:**

24 There is an unmet need for pre-clinical models to understand the pathogenesis of human  
25 respiratory viruses; and predict responsiveness to immunotherapies. Airway organoids can serve  
26 as an ex-vivo human airway model to study respiratory viral pathogenesis; however, they rely on  
27 invasive techniques to obtain patient samples. Here, we report a non-invasive technique to  
28 generate human nose organoids (HNOs) as an alternate to biopsy derived organoids. We made  
29 air liquid interface (ALI) cultures from HNOs and assessed infection with two major human  
30 respiratory viruses, respiratory syncytial virus (RSV) and severe acute respiratory syndrome  
31 coronavirus-2 (SARS-CoV-2). Infected HNO-ALI cultures recapitulate aspects of RSV and SARS-  
32 CoV-2 infection, including viral shedding, ciliary damage, innate immune responses, and mucus  
33 hyper-secretion. Next, we evaluated the feasibility of the HNO-ALI respiratory virus model system  
34 to test the efficacy of palivizumab to prevent RSV infection. Palivizumab was administered in the  
35 basolateral compartment (circulation) while viral infection occurred in the apical ciliated cells  
36 (airways), simulating the events in infants. In our model, palivizumab effectively prevented RSV  
37 infection in a concentration dependent manner. Thus, the HNO-ALI model can serve as an  
38 alternate to lung organoids to study respiratory viruses and testing therapeutics.

39 **Key words:** Nose organoids, RSV, SARS-CoV-2, cilia, palivizumab, ALI culture, epithelium,  
40 airway, mucus, therapeutics, cytokines

41

42 **Introduction:**

43           With the onset of the coronavirus disease 2019 (COVID-19) pandemic, it is imperative  
44 now more than ever to have pre-clinical, physiologically relevant airway models to evaluate viral  
45 infection and potential therapeutics. Airway organoid (AOs) models have quickly become an  
46 important investigational tool due to their ability to mimic human respiratory physiology [1].  
47 Previous studies have reported culturing AOs from human induced pluripotent stem (iPS) cells  
48 that represent the fetal or developmental stages of the lung [2-6] and the Clevers group recently  
49 reported an advanced method for long-term culturing of human lung tissue-derived AOs [7].  
50 Brewington *et al* [8] and Gamage *et al* [9] also modeled nasal epithelial cells using nasal biopsy  
51 samples and nasal brushings. However, all the above methods utilize invasive techniques and  
52 typically require physicians to obtain lung tissue or bronchoalveolar lavage or nasal brushings  
53 from patients, which limit their application to the general researchers and for therapeutic  
54 screening. Therefore, a critical need remains for the development of a non-invasive method for  
55 generating AOs that can be readily applied to both pediatric and adult populations. Here we report  
56 a novel, expandable, ex-vivo human nose organoid (HNO) model that capitalizes on non-invasive  
57 techniques and yet retains the architecture of the respiratory epithelium. Additionally, we have  
58 effectively modeled these nasal wash and swab derived HNOs to study the pathogenies of the  
59 major pediatric respiratory viral pathogen, respiratory syncytial virus (RSV), and the foremost  
60 global respiratory viral pathogen, severe acute respiratory syndrome coronavirus-2 (SARS-CoV-  
61 2).

62           Globally, RSV infection in children <5 years results in 33.1 million cases, 3.2 million  
63 hospitalizations, and up to 200,000 deaths, annually [10, 11]. RSV is the major cause of acute  
64 lower respiratory tract illness (ALRTI) in children accounting for approximately 20% of all ALRTI  
65 [12]. RSV infects almost all children by two years of age, and causes repeated reinfections  
66 throughout life [13]. RSV is also a significant cause of respiratory disease morbidity and mortality

67 in older adults, immunocompromised adults, and those with chronic pulmonary disease [14].  
68 Unlike RSV, SARS-CoV-2 pandemic has resulted in a record-breaking global disaster. The rapidly  
69 spreading SARS-CoV-2 has caused over 194 million cases and 4.1 million deaths as of July 26,  
70 2021 [15]. Therefore, it is important to develop human model systems to study viral pathology and  
71 to test therapeutics against them. In this study, we modeled an HNO-derived air liquid interface  
72 (ALI) culture system to grow and study RSV, and SARS-CoV-2 infections. The HNO-ALI cultures  
73 were readily infected by contemporaneous RSV strains (RSV/A/Ontario (ON) and RSV/B/Buenos  
74 Aires (BA)), and SARS-CoV-2 (WA-1) resulting in epithelial damage reminiscent of human  
75 pathology. Cytokine analysis of RSV and SARS-CoV-2 infected HNO epithelium demonstrated  
76 cell polarity specific response thus highlighting the importance of using polarized cells to  
77 understand the host immune response. Furthermore, this HNO respiratory virus model functions  
78 as an ex-vivo human challenge model where we tested the efficacy of palivizumab, a monoclonal  
79 antibody used for the prevention of RSV.

## 80 **Results:**

### 81 **Development of the Human Nose Organoids (HNOs).**

82 We established six lines of HNOs using stem cells isolated from nasal wash and mid-  
83 turbinate swab samples collected from human volunteers adopted from a recently published  
84 protocol [7] (Figure 1A). The 3D HNOs formed between 2-3 weeks after initial adaptation of stem  
85 cells to specialized growth media conditions (Figure 1B-C). Microscopically, the differentiated  
86 HNO-ALI culture system was composed of polarized, pseudostratified airway epithelium  
87 containing basal cells (keratin 5 positive, KRT5), secretory club cells SCGB1A1 (CC10 positive),  
88 goblet cells (mucin 5AC positive, Muc-5AC), and ciliated cells (acetylated tubulin positive, Ace-  
89 tub) (Fig 1D-G). Beating cilia of HNO-ALI were also visible under light microscopy (Movie V1).  
90 We performed RNA sequencing of undifferentiated 3D HNOs, and early (21 day) and late  
91 differentiated (31 day) HNO-ALI to analyze airway cell specific gene expression pattern. Our data

92 reveals that the HNO-ALI transcriptome was highly enriched for several of airway epithelial cell  
93 specific-markers including keratins, dynein, and secretoglobins (Appendix 1); and also showed  
94 hallmark of ciliary function as shown by gene set enrichment analysis (GSEA) (Supplemental  
95 Figure 1). In summary, our HNOs retained the in-vivo characteristics of human airway epithelium  
96 and can also be indefinitely passaged, and frozen for long-term expansion.

### 97 **Replication kinetics of RSV, and SARS-CoV-2 in HNO-ALI system.**

98 We tested the ability of the HNO-ALI system to model RSV, and SARS-CoV-2 viral  
99 infections using two HNO lines, HNO2 and HNO204. The HNO-ALI system was apically  
100 inoculated with two contemporaneous RSV strains, RSV/A/ON and RSV/B/BA, representing  
101 RSV/A and RSV/B subtypes. RSV showed robust replication in both the HNO-ALI lines reaching  
102  $\sim 5 \times 10^7$  RNA copies/ml in the apical compartment by day 5 and reaching steady state over 10  
103 days post inoculation (dpi) (Figure 2A and 2B). The infection of HNO-ALI produced infectious  
104 virions as demonstrated by plaque assays on 2, 5, 10 dpi (Figure 2D and E). Live infectious RSV  
105 was detected only on the apical side of the HNO-ALI and not on the basolateral compartment,  
106 consistent with RSV being predominantly released from the apical cells to the lumen of the HNO-  
107 ALI culture. The infection of HNO-ALI with SARS-CoV-2 (WA-1) also showed increases in  
108 extracellular viral loads reaching  $\sim 5 \times 10^8$  RNA copies/ml by day 3 and a plateau at 6-dpi (Figure  
109 2C). In contrast to RSV, SARS-CoV-2 genome was detected both on the apical lumen and the  
110 basolateral compartment of the HNO-ALI system suggesting SARS-CoV-2 virions are infecting  
111 cells in the apical layer and basolateral layers of the HNO epithelium later into the infection.

### 112 **Morphological analysis of RSV and SARS-CoV-2 infected HNO-ALI system.**

113 Changes in epithelial cell morphology upon RSV and SARS-CoV-2 infection were  
114 examined and compared by immunofluorescence labeling of HNO-ALI cultures. Both RSV and  
115 SARS-CoV-2 infected HNO-ALI cultures recapitulated in-vivo data including apical shedding of

116 viral infected cells, ciliary damage, and epithelial thinning (Figure 3A-3D). Early infection (6hrs  
117 and 1 dpi) was comparable between RSV/A/ON, RSV/B/BA, and SARS-CoV-2, but SARS-CoV-  
118 2 infection caused more damage at later time points (6-dpi). Also, RSV infection appeared  
119 confined to the apical cell layer. By contrast, SARS-CoV-2 spike protein antigen was detected  
120 deeper into the basal cell layer. Using fluorescence threshold analysis to quantify cilia expression  
121 (acetylated tubulin or Ace-Tub), we found that SARS-CoV-2 caused significantly higher ciliary  
122 damage in comparison to RSV (Figure 3E). The thickness of the epithelium also was significantly  
123 lower in SARS-CoV-2 infected cells in comparison to RSV (Figure 3F). The H&E and PAS-AB  
124 staining of HNO-ALI further revealed severe extrusion, epithelial thinning and rounding of apical  
125 cells in SARS-CoV-2 infected samples (Supplemental Figure 2). In contrast, RSV but not SARS-  
126 CoV-2 showed hypersecretion of mucus as quantified by expression of MUC5AC marker (Figure  
127 3C, 3D, 3G and Supplemental Figure 3).

128 **RSV but not SARS-CoV-2 predominantly induces interferon lambda (IFN- $\lambda$ 1) and IFN- $\gamma$**   
129 **inducible chemokine response in HNO-ALI cultures.**

130 Characterizing host immune response and identification of biomarkers is crucial towards  
131 modeling of RSV and SARS-CoV-2 pathogenesis in these advanced HNO-ALI culture systems.  
132 To do this, we performed Luminex cytokine analysis of 29 cytokines/chemokines in HNO2-ALI  
133 (Appendix 3). Bronchial and nasal epithelial cells are known to secrete inflammatory cytokines in  
134 response to viral infections. We analyzed the levels of inflammatory cytokines induced by HNO-  
135 ALI cultures in response to (i) both RSV/A/ON and RSV/B/BA infection at 1-dpi, 2-dpi, 5-dpi, and  
136 10-dpi (Appendix 3) and (ii) SARS-CoV-2 infection at 6hr, 3-dpi, and 6-dpi. RSV infection induced  
137 a strong IFN- $\lambda$ 1/IL-29 response in HNO-ALI cultures at 5-dpi and 10-dpi. In striking contrast,  
138 HNO2-ALI showed no changes in the levels of IFN- $\lambda$ 1 in response to SARS-CoV-2 infection  
139 (Figure 4A and 4G). Notably, for RSV strong inductions were observed for chemokine (C-X-C  
140 motif) ligand 10 (IP-10), CXCL9, CXCL11/IP-9 and regulated on activation, normal T cell

141 expressed and secreted (RANTES) from both the apical and basolateral side of the transwells.  
142 (Figure 4B – 4E). The C-X-C chemokine ligands are generally upregulated by IFN-gamma ( $\gamma$ )  
143 produced from activated T cells and natural killer cells, none of which were present in the HNO-  
144 ALI cultures. Next, interleukin-8 (IL-8), a classical biomarker of RSV infection was also detected  
145 at 5-dpi and 10-dpi at both the apical and basolateral side of HNO-ALI cultures (Supplemental  
146 Table 3) [16]. RSV induced high levels of vascular endothelial growth factor A (VEGF- $\alpha$ )  
147 specifically on the basolateral side of HNO-ALI. SARS-CoV-2 infections showed similar trends in  
148 the levels of the same cytokines, but the concentration of these cytokines was much lower than  
149 RSV (Figure 4I – 4L). In contrast, increase in CXCL10 (IP-10) by ~100-fold was measured on the  
150 basolateral side of SARS-CoV-2 infected samples at 6-dpi, which has been reported as a  
151 biomarker of COVID-19 disease severity (Figure 4H) [17].

152 Increase in matrix metalloproteinase 9 (MMP-9) was reported in COVID-19 patients with  
153 respiratory failure [18] and during RSV infection [19]. However, we did not detect significant  
154 changes in the levels of MMP-9 or MMP-7 to either RSV or SARS-CoV-2 (Appendix 3). Perhaps,  
155 this could be due to the inhibitory effect of TIMP-1 on MMPs. Additionally, for both RSV and  
156 SARS-CoV-2, we did not detect any changes in levels of some pulmonary fibrosis biomarkers  
157 such as transforming growth factor beta (TGF- $\beta$ ), fibroblast growth factor (FGF), granulocyte  
158 colony-stimulating factor (G-CSF), and granulocyte-macrophage colony-stimulating factor (GM-  
159 CSF) [20]. On the other hand, VEGF was elevated and has been associated with disease severity  
160 in idiopathic pulmonary fibrosis [20]. Though measured in low amounts (less than 100 pg/ml), we  
161 noticed an increase in levels of proinflammatory immune mediators such as IL-6, and IL-1 $\alpha$  for  
162 both RSV and SARS-CoV-2 as seen in clinical disease (Appendix 3). In contrast, only for RSV  
163 and at the basolateral side, monocyte chemoattractant protein 1 (MCP-1), MIP-1 $\beta$ , and tumor  
164 necrosis factor- $\alpha$  (TNF- $\alpha$ ) levels increased at 5-dpi. Eotaxin, IL-1 $\beta$ , and MCP-3 were both  
165 increased at apical and basolateral side at low levels in response to RSV infection (Appendix 3).

166 **Ex-vivo human challenge respiratory virus model in the HNO-ALI system.**

167 Although multiple pre-clinical animal models are available to recapitulate some  
168 pathognomonic aspects of RSV and SARS-CoV-2 infection, they do not faithfully represent the  
169 physiology of human airway epithelium [21-26]. Additionally, there are advanced iPS and lung  
170 tissue derived AO models where the disease can be modeled but they require access to clinical  
171 samples to establish these culture systems [7, 27, 28]. Thus, there is an unmet and urgent need  
172 for physiologically relevant, yet easily accessible pre-clinical human airway models for respiratory  
173 viral diseases to test the efficacy of therapeutics. To address this, we tested the ability of the  
174 HNO-ALI system to act as an ex-vivo human challenge respiratory virus model to test the efficacy  
175 of a known therapeutic monoclonal antibody (mAb) to RSV infection. Palivizumab (Synagis®), is  
176 a neutralizing mAb targeted against the F-glycoprotein of RSV that prevents RSV–cell fusion and  
177 hence reduces RSV replication [29]. We introduced the palivizumab mAb in the basolateral  
178 compartment and monitored its neutralizing capacity on the apical lumen mimicking the  
179 neutralizing effects of mAb in circulation on the virus exposed airway epithelium (Supplemental  
180 Figure 3B). The palivizumab concentrations used were in the biological range shortly after  
181 intravenous injection (640µg/ml) or prior to the next administration dose (80µg/ml) [30].

182 HNO2-ALI cultures pre-incubated with palivizumab at 640µg/ml suppressed  
183 RSV/A/Tracy replication up until 2-dpi. Thereafter, RSV replication resumed at 4-dpi although at  
184 reduced levels as compared to the no palivizumab control, and replication reached a peak at 6-  
185 dpi, and finally plateaued at 8-dpi (Figure 5A). This demonstrated both the efficacy of palivizumab  
186 to reduce infection in the apical ciliated cells and also suggested a decline in bioavailability of  
187 palivizumab to persistently prevent RSV replication at later time points. In a subsequent  
188 experiment, HNO-ALI cultures were pre-incubated with palivizumab prior to the virus inoculation  
189 and given a second dose at 4-dpi. In this experimental setup, RSV/A/Tracy failed to replicate in  
190 HNO-ALI culture at both 640µg/ml and 80µg/ml of palivizumab (Figure 5B). Nonetheless,



191 palivizumab resistant strain- RSV/Tracy<sup>P-Mab R</sup> [31] readily replicated in palivizumab pre-treated  
192 HNO-ALI cultures demonstrating the specificity of palivizumab in preventing RSV infection  
193 (Figure 5C). Furthermore, we analyzed the cytokines expressed by palivizumab pre-incubated-  
194 HNOs that were inoculated with RSV. Palivizumab pre-treatment with either the 80 or 640 µg/ml  
195 dose, followed with second dose not only prevented RSV replication (Figure 5B and 5E) but also  
196 abolished the virus-induced inflammatory cytokines that would have been released into the apical  
197 lumen and basolateral compartment (Figure 5G – 5K).

## 198 **Discussion**

199 Airway organoids are three-dimensional airway culture systems that were first developed  
200 in 1993 with self-organizing 3D structures [32]. To date, there are only a handful of AO models  
201 that are produced using invasive lung biopsy or bronchoalveolar lavage (BAL) patient-donor  
202 materials [4, 6, 7, 33-39]. In this study for the first time, we describe a non-invasive, reproducible  
203 and a reliable approach to establish human nose organoids (HNOs) that allows for long-term  
204 expansion. Earlier studies used invasive nasal brushing samples or biopsy samples that are  
205 traditionally obtained from human subjects undergoing bronchoscopy procedures. In our protocol,  
206 we used human nasal wash and mid-turbinate swab samples from healthy volunteers to generate  
207 nasal organoids. The ease in obtaining the nasal wash/mid-turbinate swab samples facilitates our  
208 non-invasive approach into the general adult population as well as the vulnerable pediatric  
209 population. These nasal wash and mid-turbinate samples can either be self-collected or through  
210 a trained laboratory technician. A notable difference between our HNO-ALI culture and other ALI  
211 is the richness and stratification of airway epithelium [8, 36-39]. While nasal epithelial cells  
212 reported by *Muller et al*, *Brewington et al*, and *Liu et al* can be grown in ALI conditions they are  
213 predominantly represented as a single monolayer of cells. In contrast, our HNO-ALI system  
214 derived from HNOs exhibits a complex pseudostratified epithelium interlaced with basal, goblet,  
215 club, and ciliated cells with spontaneous synchronization of beating cilia (Figure 1D-G and Movie

216 V1). In short, this newly developed HNO model offers an elegant solution to develop in-vitro  
217 human respiratory airway models that can be used across several basic-science laboratories to  
218 model respiratory diseases.

219 RSV infections cause millions of hospitalizations every year [10] and almost all children  
220 are infected with RSV by two years of age with repeated reinfections occurring throughout life  
221 [13]. Another most important pathogen in the current scenario is SARS-CoV-2, the causative  
222 organism of COVID-19. AO systems are known for the robustness to model respiratory viral  
223 infections such as SARS-CoV-2 [35, 40], influenza virus [34], enterovirus [41], and other  
224 respiratory diseases [1]. We tested the usefulness of our HNOs as ex-vivo culture system for  
225 studying two major human respiratory viruses: RSV, and SARS-CoV-2. Traditional cell culture  
226 models including immortalized and primary airway epithelial cell lines, viral inoculum is introduced  
227 in the cell culture media. This limits the exposure of air to airway epithelium, which is a critical  
228 component for physiological relevance. Additionally, most of the existing 3D airway organoid  
229 models have the apical side facing inward and microinjections are needed to establish infection.  
230 In our HNO-ALI model, the apical side of the epithelium is both accessible and air exposed, thus  
231 making it both physiologically relevant and highly suitable for studying respiratory viral infections.  
232 Here, we report that the HNO-ALI system readily supports the replication and growth of RSV and  
233 SARS-CoV-2 (Figure 2A- 2C) and the newly released virions from these cultures are infectious  
234 (Figure 2D, and 2E). Using immunohistochemistry, we also showed that the apical ciliated  
235 epithelial cells are indeed the main target for RSV (Figure 3A). These results are consistent with  
236 previously published studies on AOs and RSV where apical infection of ciliated cells was  
237 observed [7, 42-44]. Although we did not detect any RSV infection of basal cells, in contrast to  
238 our observation, a previous study has noted that basal cells if exposed to RSV are susceptible to  
239 RSV infection suggesting a pathogenic mechanism for additional airway damage in individuals  
240 with chronic lung disease [45]. Next, in our study we observed that only RSV induced a robust

241 increase in expression of MUC5AC (Figure 3C) and this was comparable to the *Persson et al*  
242 study where they have also reported expansion of MUC5AC secretory cells in response to RSV  
243 infection [45]. Unlike RSV, SARS-CoV-2 induced severe damage to the ciliary epithelium without  
244 an increase in mucus secretion (Figure 3B, and 3D).

245 We performed a thorough characterization of host immune response to RSV and SARS-  
246 CoV-2 infection in HNO-ALI system. Although RSV infection predominantly occurred at the apical  
247 surface, we measured higher levels of cytokine response to viral infection on the basolateral side  
248 suggesting translocation of infection signals from the apical side to the basolateral compartment  
249 mimicking physiological relevance. We also observed a strong type-III interferon (IFN- $\lambda$ 1/IL-29)  
250 response for RSV and not SARS-CoV-2 suggesting stark differences in the role of the epithelial  
251 cells in initiating the early innate and antiviral immune signaling. It was interesting to observe that,  
252 the increase in IFN- $\lambda$ 1/IL-29 responses to RSV at 5-dpi was associated with a reduced or stalled  
253 viral replication beyond 5-dpi as noted by plateauing of viral copy number measured by RT-PCR  
254 (Figure 2A, 2B and 4A) or infectious virus (Figure 2D, 2E and 4D) measured by a plaque assay.  
255 Additionally, a previous study has shown association of IFN- $\lambda$ 1/IL-29 and increase in MUC5AC  
256 secretory cells during RSV infection [45]. Consistent with these findings our data also  
257 demonstrates both increase in IFN- $\lambda$ 1 and MUC5AC expression in response to RSV infection in  
258 HNO-ALI cultures (Figure 3B, 3D and 4A). However, future studies are needed to clarify the  
259 mechanisms of hypersecretion of MUC5AC induced by RSV in HNO-ALI system.

260 IFN- $\gamma$  inducible cytokine/chemokine response (IP-9, CXCL-9 and RANTES) and increase  
261 in VEGF- $\alpha$  was noted to both RSV and SARS-CoV-2 infection (Figure 4). This data is in  
262 accordance with clinical findings in patients from previously published studies, where high levels  
263 of IFN- $\gamma$  and CXCL10 (IP-10) were seen for RSV [46-48]. IP-10, a biomarker for both RSV and  
264 COVID-19 severity was detected in the infected HNO2 cultures. In contrast, a study conducted  
265 by *Rijsbergen et al* showed no increase in IP-10 in response to RSV infection in nasal epithelial

266 cells [44]. An important remark: previous studies using airway epithelial culture system have  
267 shown and supported the growth of RSV and SARS-CoV-2 only up to 4-dpi [7, 28, 40]. However,  
268 in our system, we extended the viral infection for RSV beyond 8 days and for SARS-CoV-2 beyond  
269 6 days. This allows for long-term study of viral infections. Thus, we hope that this HNO-derived  
270 airway epithelial model will greatly enhance the understanding of RSV and SARS-CoV-2  
271 pathogenesis.

272         Currently, there is an unmet need for an easily available preclinical human model to study  
273 RSV and SARS-CoV-2 infections that recapitulates the human experience. While animal models  
274 of infection have provided major insights, they have also misdirected our understanding of viral  
275 pathogenesis and prevention [25]. Also, the cost, safety and ethical issues associated with human  
276 challenge models limit their use and access [49]. Our ex-vivo HNO-ALI model is an alternative to  
277 the human challenge model. In our study, HNO-ALI cultures were pre-treated with palivizumab to  
278 model immunoprophylaxis treatment to prevent RSV infection. A single dose of palivizumab pre-  
279 treatment of HNO-ALI culture was only partially effective in reducing RSV replication (1-dpi at  
280 80µg/ml; and up to 2-dpi at 640µg/ml). Nonetheless, when a second dose of palivizumab was  
281 administered at 4-dpi, RSV was unable to replicate in HNO-ALI system and the HNOs did not  
282 produce inflammatory cytokines in response to RSV infection demonstrating the  
283 immunoprophylactic protection against RSV infection and disease. Indeed, our HNO-ALI system  
284 more closely resembled the human experience where therapeutic mAb or polyclonal antibodies  
285 are administered intramuscularly or intravenously, respectively, to get into the blood circulation  
286 and provide protection of the airways against RSV infection [50-52]. Thus, these HNOs will  
287 provide a more precise human milieu and can function as a pre-clinical human model to  
288 investigate promising therapeutics while recapitulating the complex interactions between the  
289 drug, the virus, and the airway cells.

290 We are of the opinion that, at the current stage, the HNO-ALI system remains at a highly  
291 reductionist level and has the potential for improvements. This includes advancements of HNO-  
292 ALI system with 1) addition of immune cells, 2) endothelial cells to further mimic the complex  
293 physiology of organs and 3) furthermore genetic knock-ins and knockouts can be made to study  
294 the role of specific host components in microbial infections and human diseases. With these future  
295 advancements, the HNOs can be optimized to develop next-generation in-vivo human airway  
296 models and used as a valuable tool to evaluate pathogenesis, therapeutics, and vaccine  
297 candidates for major global respiratory viral pathogens. In addition, the HNOs retain the genetic  
298 background of the individual, thus allowing the possibility to screen drugs for cancer therapeutics,  
299 genetic-disease modeling, and development of personalized medicine.

### 300 **Methods:**

301 Obtaining nasal wash/ nasal swab samples: The samples were collected under the Institutional  
302 Review Board (IRB) of the Baylor College of Medicine (BCM), Houston, Texas, USA with written  
303 informed consent. Self-collected nasal wash samples were obtained by instilling 3 ml of saline  
304 into each nostril and collecting the fluid into a sterile cup. A paired mid-turbinate nasal swab from  
305 the same volunteer was also obtained using a flocked swab. The paired nasal wash and nasal  
306 swab samples were mixed and stored on ice until further processed.

### 307 Establishing Human Nose Organoids (HNOs).

308 The generation of nasal wash and nasal swab derived HNOs was based on the published protocol  
309 [7]. The nasal wash along with the flocked swab was spun at 80g for 5 minutes at 4°C.  
310 Supernatant was carefully removed and sheared using a 29-gauge insulin syringe to break up  
311 mucus (if any). Digestion medium [10ml AO medium + 10mg Collagenase (Sigma C9407) +100µl  
312 Fungizone (Amphotericin B)] was added and the falcon tube was kept on a rocker for 30-60  
313 minutes at 37°C. After digestion, the nasal swab was discarded, and fetal bovine serum (FBS)

314 was added to inactivate collagenase. The above solution was sheared using a syringe, strained  
315 through a 100µm strainer, and spun at 80g for 5 minutes at 4°C. The supernatant was removed,  
316 and the cell pellet was washed twice with Wash Medium (96 ml Advanced DMEM/F12 + 1 ml  
317 Glutamax 100x + 1 ml HEPES 1M + 1ml Pen/Strep + 1ml Fungizone) and spun at 80g for 5  
318 minutes at 4°C. Finally, the Wash Medium was removed, and the cell pellet was suspended in  
319 Matrigel® and plated onto a 24 well plate and incubated for 10 minutes at 37°C. Once Matrigel®  
320 had solidified, 500µl of AO medium with Penicillin Streptomycin Amphotericin (PSA) was added  
321 to each well and the plate was transferred into 37°C incubator. AO medium was replaced every 4  
322 days and passaged every other week at 1:2 ratio (wells) for expansion.

### 323 Generation of HNO-Air Liquid Interface (ALI) cultures:

324 The mature 3D HNOs were enzymatically and mechanically sheared to make ALI cultures using  
325 our previous method adopted from enteroid monolayer technology and conditions utilized for  
326 growing human bronchial epithelial cells [33, 53-56]. Clear transwells (Corning Costar, Catalog #  
327 3470) were pre-coated with 100µl of Bovine Type I collagen at 30µg/ml (Gibco, Catalog #  
328 A1064401) and placed in an incubator for 1.5 hour at 37°C. HNO cultured in AO medium for 7  
329 days were dissociated using 0.5mM EDTA and spun at 300g for 5 minutes at 4°C. Single cells  
330 were obtained by adding 0.05% Trypsin/0.5mM EDTA (Invitrogen, Catalog # 25300054) for 4  
331 minutes at 37°C. Trypsin was inactivated by addition of AO medium containing 10% FBS. The  
332 HNOs were dissociated vigorously using pipette tips, passed through 40µm strainer (Falcon,  
333 Catalog # 352340) and pelleted at 400g at room temperature for 5 minutes to generate single  
334 cells. The pellet was resuspended in AO medium containing 10µM Y-27632 + Epidermal Growth  
335 Factor (EGF) (Peprotech-AF-100-15). The collagen coating from transwells was removed,  
336 washed with phosphate buffered saline (PBS) and the single cells were added at a seeding  
337 density of  $3 \times 10^5$  cells/well. 750µl of AO medium + EGF containing 10µM Y-27632 (Sigma,  
338 Catalog # Y-0503) was added into the lower compartment of the transwells. After 4 days, confluent

339 monolayers are cultured in air-exposed conditions using differentiation medium (PneumaCult-ALI  
340 medium from STEMCELL Technologies) in lower compartments for Transwell until 21 days.

341 Viral infection, PCR, and plaque assays.

342 An overview of the infection method is provided in Supplemental Figure 3A. The differentiated  
343 HNO-ALI cells were apically infected with RSV/A/USA/BCM813013/2013(ON) (RSV/A/ON),  
344 RSV/B/USA/BCM80171/2010(BA) (RSV/B/BA), SARS-CoV-2 [Isolate USA-WA1/2020, obtained  
345 from Biodefense and Emerging Infectious resources (BEI)] at a multiplicity of infection 0.01  
346 (30µl/well). All work with SARS-CoV-2 was performed in a Class II Biosafety Cabinet in the BSL-  
347 3 high-containment facility at BCM. For mock infection, AO-differentiation media (30 µl/well) alone  
348 was added. The inoculated plates were incubated for 1.5 hours 37 °C with 5% CO<sub>2</sub>. At the end  
349 of incubation, the inoculum was removed from the HNO-ALI system and left air-exposed for the  
350 defined period of infection. At the respective time points, the apical side of the transwells was  
351 washed twice with 150µl of AO differentiation media and mixed with equal volume of 15% glycerol  
352 Iscoves media. On the basolateral side, 300µl of the media was removed and mixed with equal  
353 volume of 15% glycerol Iscoves media. The obtained samples were used for detection of viral  
354 RNA, infectious virions, and host cytokines. Samples were snap frozen and stored at -80°C. The  
355 viral RNA was extracted using Mini Viral RNA Kit (Qiagen Sciences) in an automated QIAcube  
356 platform according to the manufacturer instructions [57]. Viral RNA was detected using real time  
357 polymerase chain reaction (RT-PCR) with primers targeting the nucleocapsid gene for RSV,  
358 SARS-CoV-2 as previously described [57, 58]. RSV titer was measured using semi-quantitative  
359 plaque assay as previous described [59].

360 Immunohistochemistry (IHC), and Immunofluorescence labeling (IF).

361 HNO-ALI cultures were fixed in image-iT™ Fixative Solution (4% formaldehyde)[Catalog number:  
362 FB002] for 15 minutes followed by dehydration in ethanol series (30%, 50%, 70% and 90%, each



363 30 minutes at room temperature or overnight at 4°C). The transwells membranes were then  
364 subjected to paraffin embedding, and sectioning. Standard H&E (hematoxylin and eosin) and  
365 PAS/AB (Periodic acid–Schiff/ Alcian-Blue) staining was performed. For immunofluorescent  
366 labeling, the sections were deparaffinized in Histo-Clear (Electron Microscopy Science, 64111-  
367 01), followed by washes in an alcohol sequence (100>100>95>65 %). The slides were then  
368 rehydrated and exposed for heat-induced antigen retrieval in 10 mM Sodium Citrate buffer pH 6  
369 or 20 mins at sub-boiling temperature [60]. The sections were rinsed in water and blocked for 60  
370 min in 1% bovine serum albumin (BSA) in Tris buffered saline with Tween20 (TBS-T) (blocking  
371 buffer). The sections were incubated overnight at 4°C with the following primary antibodies, 0.25  
372 µg/ml keratin 5 (KRT5; BioLegend, Catalog number: 905503), 0.2µg/ml SCGB1A1 (CC10; Santa  
373 Cruz, Catalog number: sc-365992 AF488), 0.2µg/ml acetylated alpha tubulin (Santa Cruz, sc-  
374 23950 AF488), 0.2µg/ml Mucin 5AC (Invitrogen, Catalog number: 45M1), goat anti-RSV IgG  
375 antibody (Abcam, Catalog number: ab20745) and rabbit anti-SARS-CoV-2 S1 IgG Antibody (Sino  
376 biologicals, Catalog number: 40150R007; BEI Resources, Catalog number: NR10361, 1:2000  
377 dilution of the antiserum). Primary antibodies were washed three times in TBS+0.05 % Tween for  
378 10 min each, incubated with secondary antibodies from Invitrogen, for 1hour at room temperature,  
379 washed twice with TBS-T, and stained with 4',6-diamidino-2-phenylindole (DAPI), washed twice  
380 with PBS, and mounted in VECTASHIELD Plus Antifade mounting media (Vector Laboratories,  
381 Burlingame, CA, H-1900). The slides were stored at 4°C until imaging.

#### 382 Immunofluorescence image quantification and analysis:

383 High quality/high resolution automated imaging was performed on a Cytiva DV Live  
384 epifluorescence image restoration microscope using an Olympus Plan Apo N 60X/1.42 NA  
385 objective and a 1.9k x 1.9k pco. EDGE sCMOS\_5.5 camera with a 1024x1024 FOV. The filter  
386 sets used were DAPI (390/18 excitation, 435/48 emission), FITC (475/28 excitation, 523/36  
387 emission), TRITC (542/27 excitation, 594/45 emission), and CY5 (632/22 excitation, 676/34



388 emission). Z stacks (0.25 $\mu$ m) of the whole section (~10 $\mu$ m) were acquired before applying a  
389 conservative restorative algorithm for quantitative image deconvolution using SoftWorx v7.0. Max  
390 intensity projections were used for image analysis and processed using ImageJ/Fiji. Between 6  
391 and 10 slides were imaged per treatment/biological replicate and analyzed for IF studies. Every  
392 experiment was performed in two technical transwell replicates and repeated for minimum of two  
393 biological replicates. For visualization, RSV/SARS-CoV-2 spots were enhanced by histogram  
394 stretching across treatments, post image acquisition in Fiji. The average area of ciliated epithelium  
395 was quantified by cell counts with acetylated-tubulin in Fiji at the beginning of each infection (day  
396 1 for RSV, 6hr for SARS-CoV-2), the midpoint (day 5 for RSV, 3 days for SARS-CoV-2), and the  
397 endpoint of infection assays (day 10 for RSV and day 6 for SARS-CoV-2). Quantification of  
398 amount of epithelial damage by RSV-A, and SARS-CoV-2 was measured by calculating the  
399 average thickness of the epithelium in  $\mu$ m. Percentage of goblet cells (MUC5AC labeled area)  
400 relative to DAPI after infection with RSV-A, RSV-B and SARS-CoV-2 was measured using the  
401 formula " $\mu$ m<sup>2</sup> MUC5AC label /  $\mu$ m<sup>2</sup> of epithelium (DAPI)" at the beginning of each infection (day 1  
402 for RSV, 6hr for SARS-CoV-2), the midpoint (day 5 for RSV, 3 days for SARS-CoV-2), and the  
403 endpoint of infection assays (day 10 for RSV and day 6 for SARS-CoV-2). GraphPad Prism 9.0  
404 was used to construct graphs and perform statistical tests.

#### 405 Multiplex Luminex Immunoassays.

406 Cytokines and chemokines secreted by HNO-ALI cells were measured and analyzed using  
407 Milliplex cytokine/chemokine magnetic bead panel (Millipore) according to the manufacturer's  
408 instructions. The kits used in this study include 1) Milliplex Human Cytokine Panel with  
409 Eotaxin/CCL11, FGF-2, G-CSF, GM-CSF, IL-1a, IL-1b, IL-6, IL-8/CXCL8, IL-17E/IL-25, IP-  
410 10/CXCL10, MCP-1, MCP-3, MIG, MIP1a, MIP1b, RANTES/CCL5, TNF $\alpha$ , VEGF-A, IL-33, TRAIL,  
411 TSLP, TAC/CXCL11, IL-29, BAFF and HMGB1, 2) TGF $\beta$ 1 Singleplex kit, 3) Milliplex Human  
412 MMP Panel 2 with MMP9 and MMP7 and 4) Milliplex Human TIMP Panel 2 with TIMP1. Data

413 were obtained with Luminex xPONENT for MAGPIX, version 4.2 Build 1324 and analyzed with  
414 MILLIPLEX Analyst version 5.1.0.0 standard Build 10/27/2012.

#### 415 Immunoprophylaxis model of HNO-ALI:

416 To establish and test the feasibility of HNO-ALI system to serve as an ex-vivo human airway  
417 challenge model, we developed an immunoprophylaxis system using palivizumab antibodies to  
418 prevent RSV infection. An overview of the immunoprophylaxis model is summarized in  
419 Supplemental Figure 3B. The differentiated HNO-ALI cells were apically infected with  
420 RSV/A/USA/BCM-Tracy/1989 (GA1) and RSV-Tracy resistant to Palivizumab at a multiplicity of  
421 infection 0.01 (30 $\mu$ l/well). In our model, palivizumab was introduced on the basolateral  
422 compartment either 30 minutes prior to RSV infection or at both 30 minutes prior to RSV infection  
423 and a second dose at 4-dpi. Palivizumab was administered on the basolateral side of HNO-ALI  
424 system at 80 $\mu$ g/ml; and 640 $\mu$ g/ml.

#### 425 Statistical analysis:

426 A statistical significance was determined by two-way ANOVA. Tukey's multiple comparison tests  
427 are performed using GraphPad Prism version 7.0 Windows (Graph Pad Software, San Diego,  
428 CA, [www.graphpad.com](http://www.graphpad.com)). Differences in the means are considered significant at  $p \leq 0.05$  with  
429 specific p values detailed in the figure legends.

#### 430 Acknowledgements:

431 The model figures were created with BioRender.com.

432 These studies were supported in part by grant U19 AI144297 that is as part of the U19 program  
433 (Genomic Centers of Infectious Diseases-GCID) from the National Institutes of Health (NIH).  
434 Cytokine analysis through Luminex platform was supported by Public Health Service Grant  
435 P30DK056338, funding to the Texas Medical center Digestive Disease Center. Imaging for this

436 project was supported by the Integrated Microscopy Core at Baylor College of Medicine and the  
437 Center for Advanced Microscopy and Image Informatics (CAMII) with funding from NIH (DK56338,  
438 CA125123, ES030285), and CPRIT (RP150578, RP170719), the Dan L. Duncan Comprehensive  
439 Cancer Center, and the John S. Dunn Gulf Coast Consortium for Chemical Genomics. Funders  
440 had no role in design of experiment, data collection or interpretation of data.

441

442 **Figure 1: Derivation and characterization of Human Nose Organoids (HNOs).** (A) Schematic  
443 representation of the workflow for making of HNOs. (B) Bright field image of 3D HNOs in culture.  
444 Scale bar equals 100 $\mu$ m. (C) H&E staining of 3D HNOs. (D) H&E staining of pseudostratified  
445 airway epithelium of HNO-ALI culture. (E-F). Immunofluorescence of HNOs. Basal cells are  
446 labeled by KRT5, in red. DAPI stains each nucleus. (E) Goblet cells are shown in green, labeled  
447 by MUC5AC. (F) Ciliated epithelium is shown in green, labeled by Ace-tubulin and (G) Club cells  
448 in green, labeled by CC10. Scale bar equals 10 $\mu$ m.

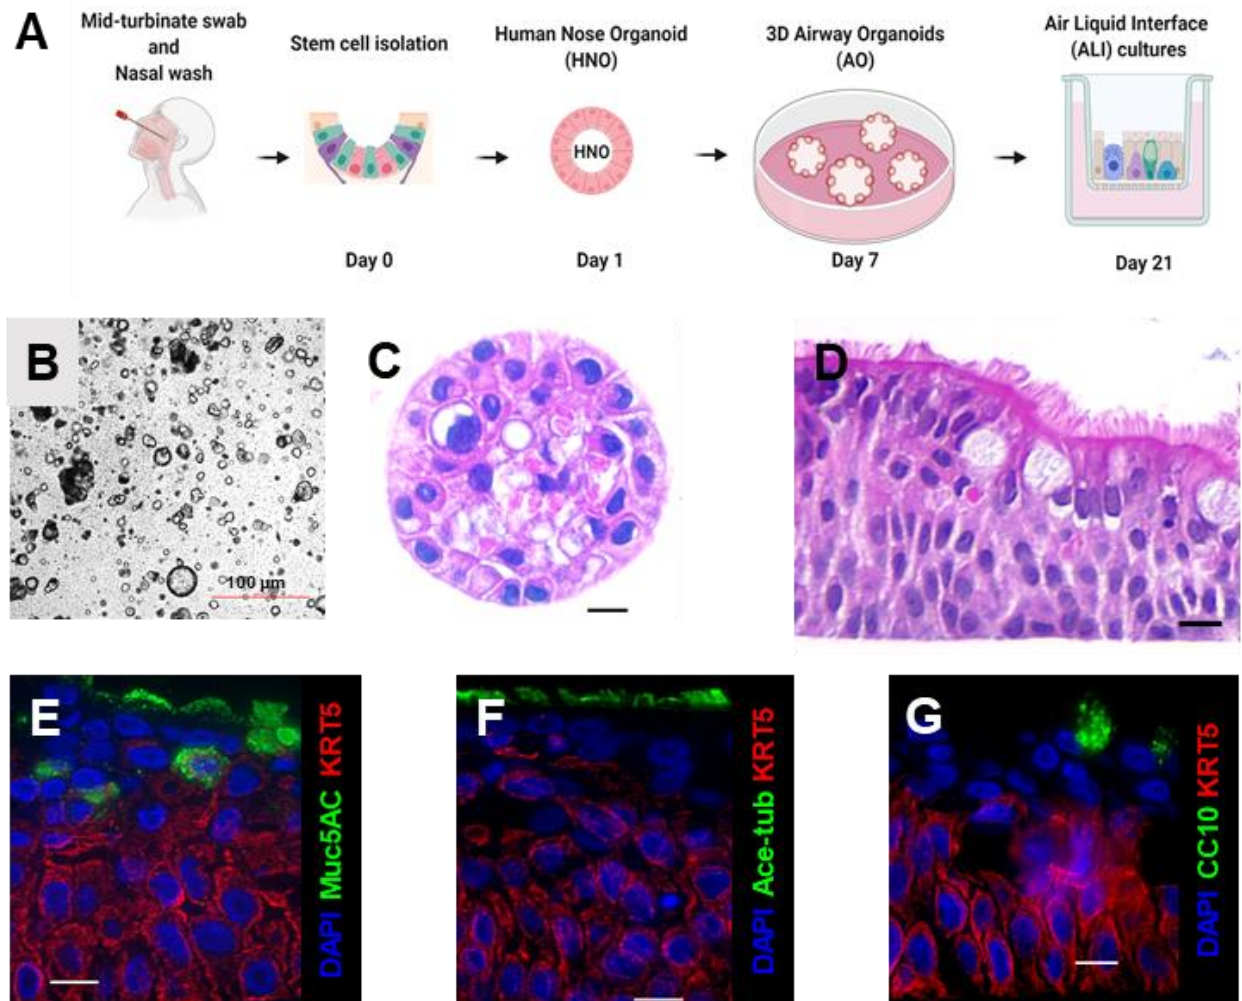

449

450

451 **Figure 2: Infection of Human Nose Organoids (HNOs) with RSV and SARS-CoV-2.** (A-C)  
 452 HNO- Air Liquid Interface (ALI) cells were apically infected with RSV/A/Ontario (ON),  
 453 RSVB/Buenos Aires (BA) at an MOI of 0.01. Apical and basolateral samples were collected at 1-  
 454 , 2-, 5-, and 10-days post-inoculation (dpi), in two distinct HNO cell lines (HNO2 and HNO204).  
 455 RNA was isolated from media and copy numbers of RSV N gene RNA were determined using  
 456 quantitative real time PCR (qRT-PCR). Levels of RSV N gene (copies/ml) from (A) RSV/A/ON at  
 457 different time points, (B) RSV/A/BA at different time points. (C) HNO-ALI cells were infected with  
 458 SARS-CoV-2. Apical and basolateral samples were collected at the time of infection, 3- and 6-  
 459 dpi in two distinct HNO cell lines (HNO2 and HNO204). RNA was isolated from media, SARS-  
 460 CoV-2 copy numbers of N gene RNA was determined using qRT-PCR. (D-E) Infectious viral titers  
 461 reported as plaque forming unit (PFU) per ml for RSV/A/ON and RSV/B/BA using a quantitative  
 462 plaque assay. Data shown were from two individual experiments with two technical replicates per  
 463 group in each experiment and are represented as mean  $\pm$  SD.

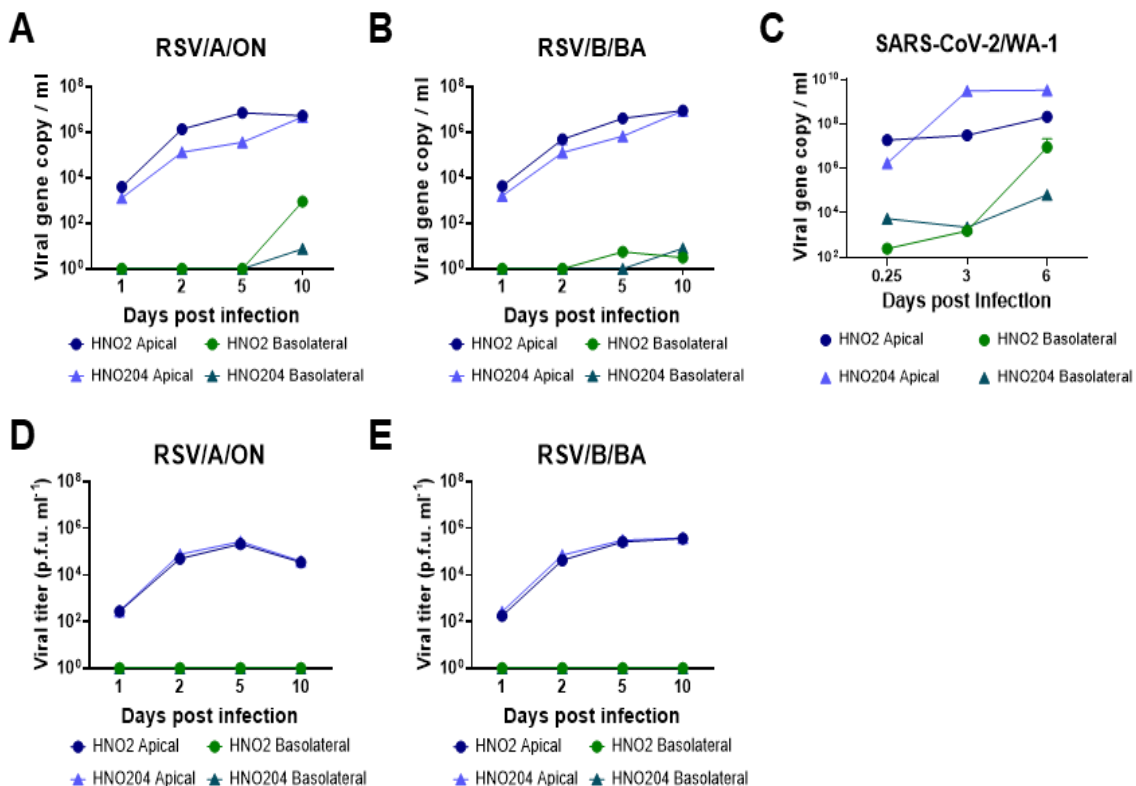

465 **Figure 3: Immunofluorescence and morphological analysis of RSV and SARS-CoV-2**  
466 **infected Human Nose Organoid-Air Liquid Interface (HNO-ALI) system. (A-D)**  
467 Representative deconvolved epifluorescence images of HNOs cells showing nuclei (DAPI, blue),  
468 and basal cells (KRT5, red). In panel (A) cilia (ace-tubulin, green), and RSV (F-protein, yellow)  
469 are shown, in panel (B) cilia (ace-tubulin, green), SARS-CoV-2 (spike protein, yellow, (C) goblet  
470 cells (MUC5AC, green), RSV (F-protein, in yellow) and (D) goblet cells (MUC5AC, green), and  
471 SARS-CoV-2 (spike protein, yellow). (E-G) Quantification of (E) ciliary damage, (F) epithelial  
472 damage and (G) MUC5AC expression of HNO-ALI infected by RSV/A/ON, RSV/B/BA and SARS-  
473 CoV2. Data were collected from 10 representative images per group in each experiment and are  
474 represented as mean  $\pm$  SD. (\* p=0.05, \*\* p = 0.01 and \*\*\* p = 0.001). Scale bar equals 10 $\mu$ m.  
475



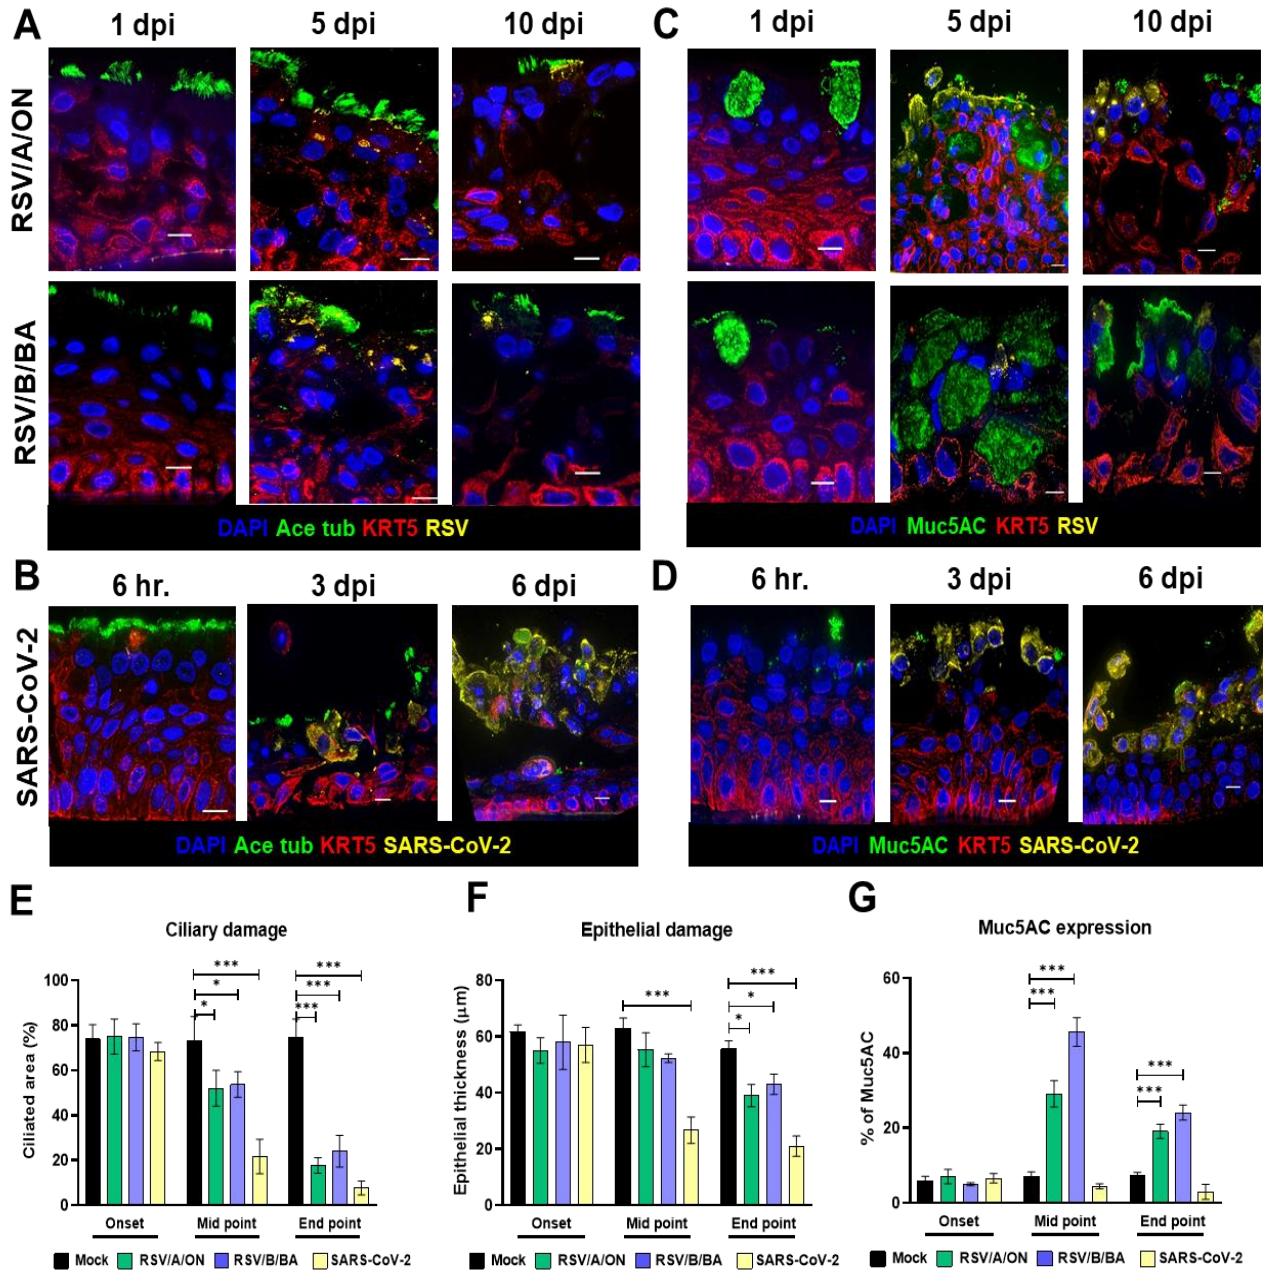

476

477

478 **Figure 4: Immune cytokine/chemokine profile of Human Nose Organoids (HNOs) infected**  
479 **with Respiratory Syncytial Virus (RSV) and severe acute respiratory syndrome coronavirus**  
480 **2 (SARS-CoV-2).** Cells were infected with RSV/A/Ontario (ON), RSVB/Buenos Aires (BA) at a  
481 multiplicity of infection (MOI) of 0.01. The cultured supernatants were harvested from mock, RSV  
482 and severe acute respiratory syndrome coronavirus-2 (SARS-CoV-2) infected cells. Profiles of  
483 extracellular cytokines and chemokines released in the supernatants were determined by the  
484 Multiplex-Luminex cytokine assay. (A-F) Levels of cytokines and chemokines released from  
485 HNO2 cells infected with contemporaneous RSV strains RSV/A/ON and RSV/B/BA. (G-L) Levels  
486 of cytokines and chemokines released from HNO2 cells infected with SARS-CoV-2 (WA-1 strain).



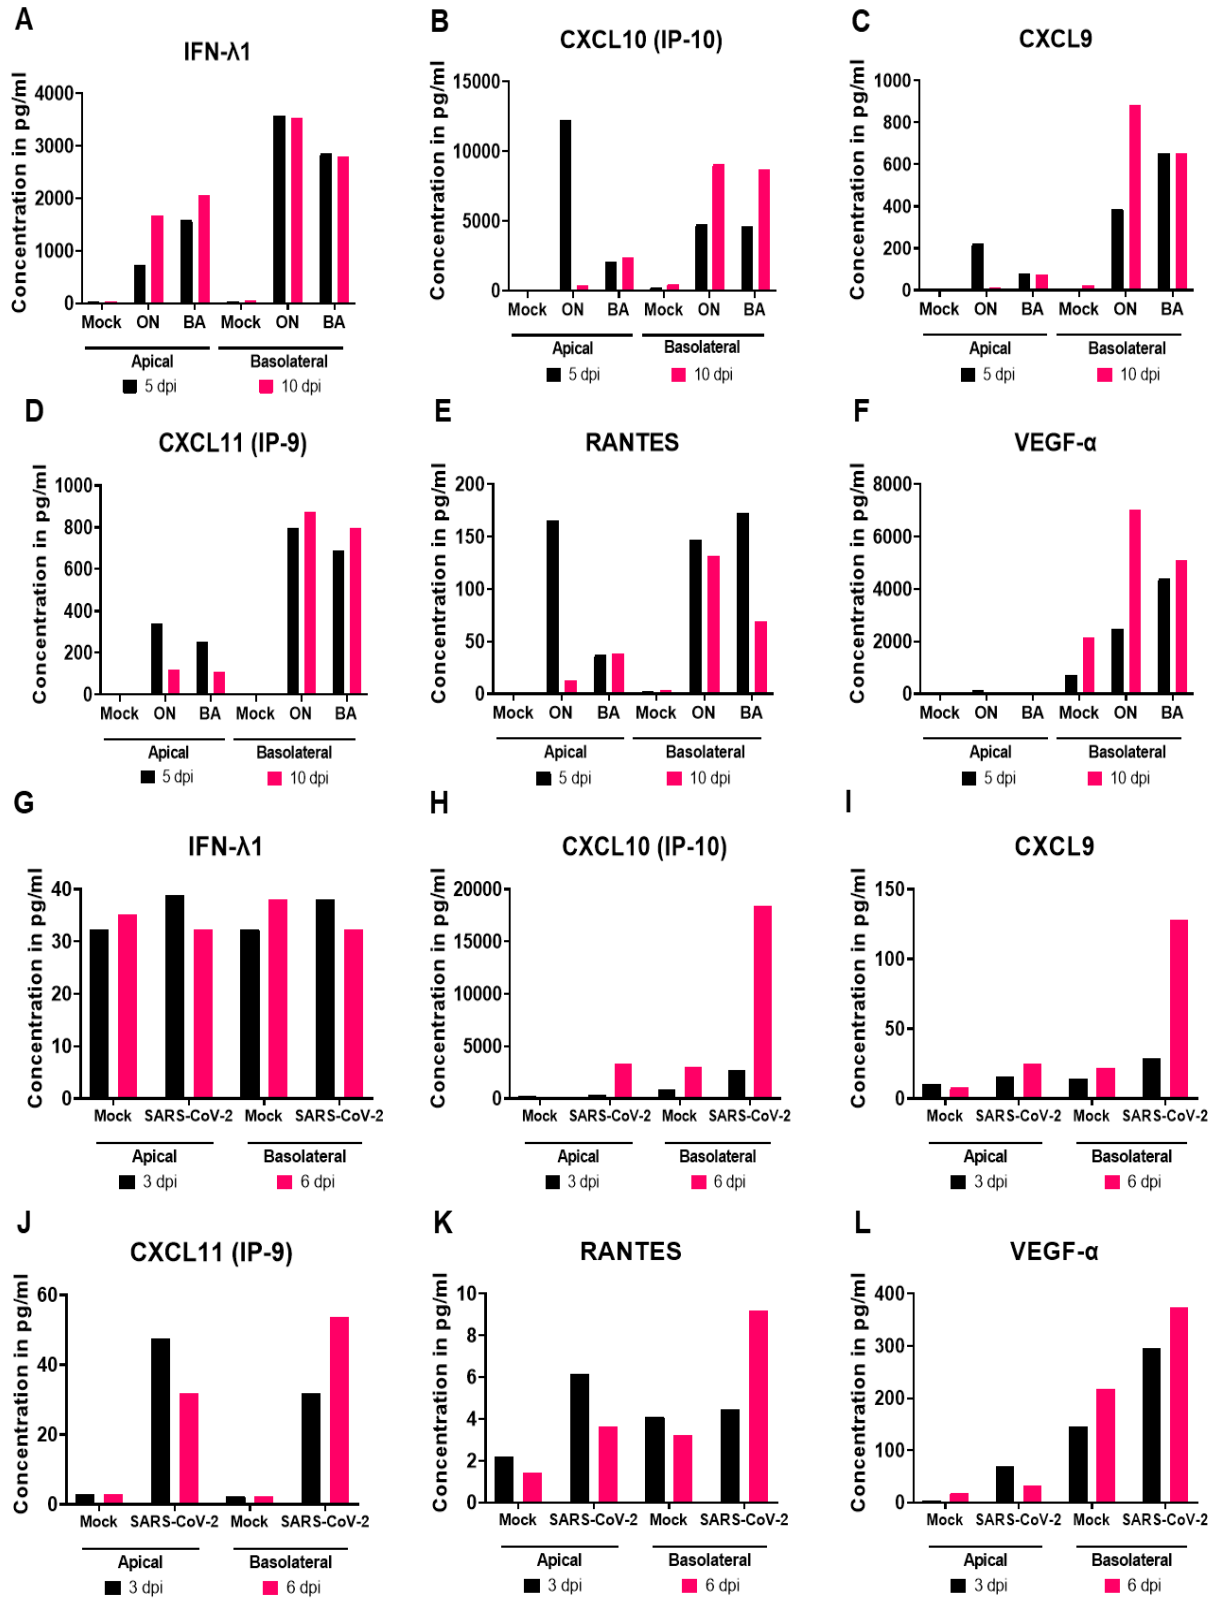

487

488

489 **Figure 5: Immunoprophylaxis treatment for Respiratory Syncytial Virus (RSV) infection in**  
490 **Human Nose Organoids (HNOs).** (A-C) shows viral copy number of RSV/A/Tracy after treatment  
491 with palivizumab of 0 $\mu$ g/ml, 80 $\mu$ g/ml, and 640 $\mu$ g/ml at 1, 2, 4, 6, and 8 dpi were measured. (A)  
492 demonstrates only an initial but not sustained decrease in RSV copy number with a single dose  
493 of Palivizumab pre-treatment. (B) shows a significant reduction in RSV replication across the  
494 infection period with the addition of a “booster” dose of Palivizumab at day 4, in a dose-dependent  
495 manner. (C) exhibits specificity of Palivizumab pre-treatment, as strain RSV/A/Tracy<sup>Mab-R</sup> is  
496 resistant to the antibody, and hence showed no decrease in infection. (D-F) Quantification of  
497 infective viral particles using plaque assay for the experiments described above. (G-K) shows the  
498 levels of inflammatory cytokines released by RSV-infected HNOs under Palivizumab treatment  
499 conditions.

500

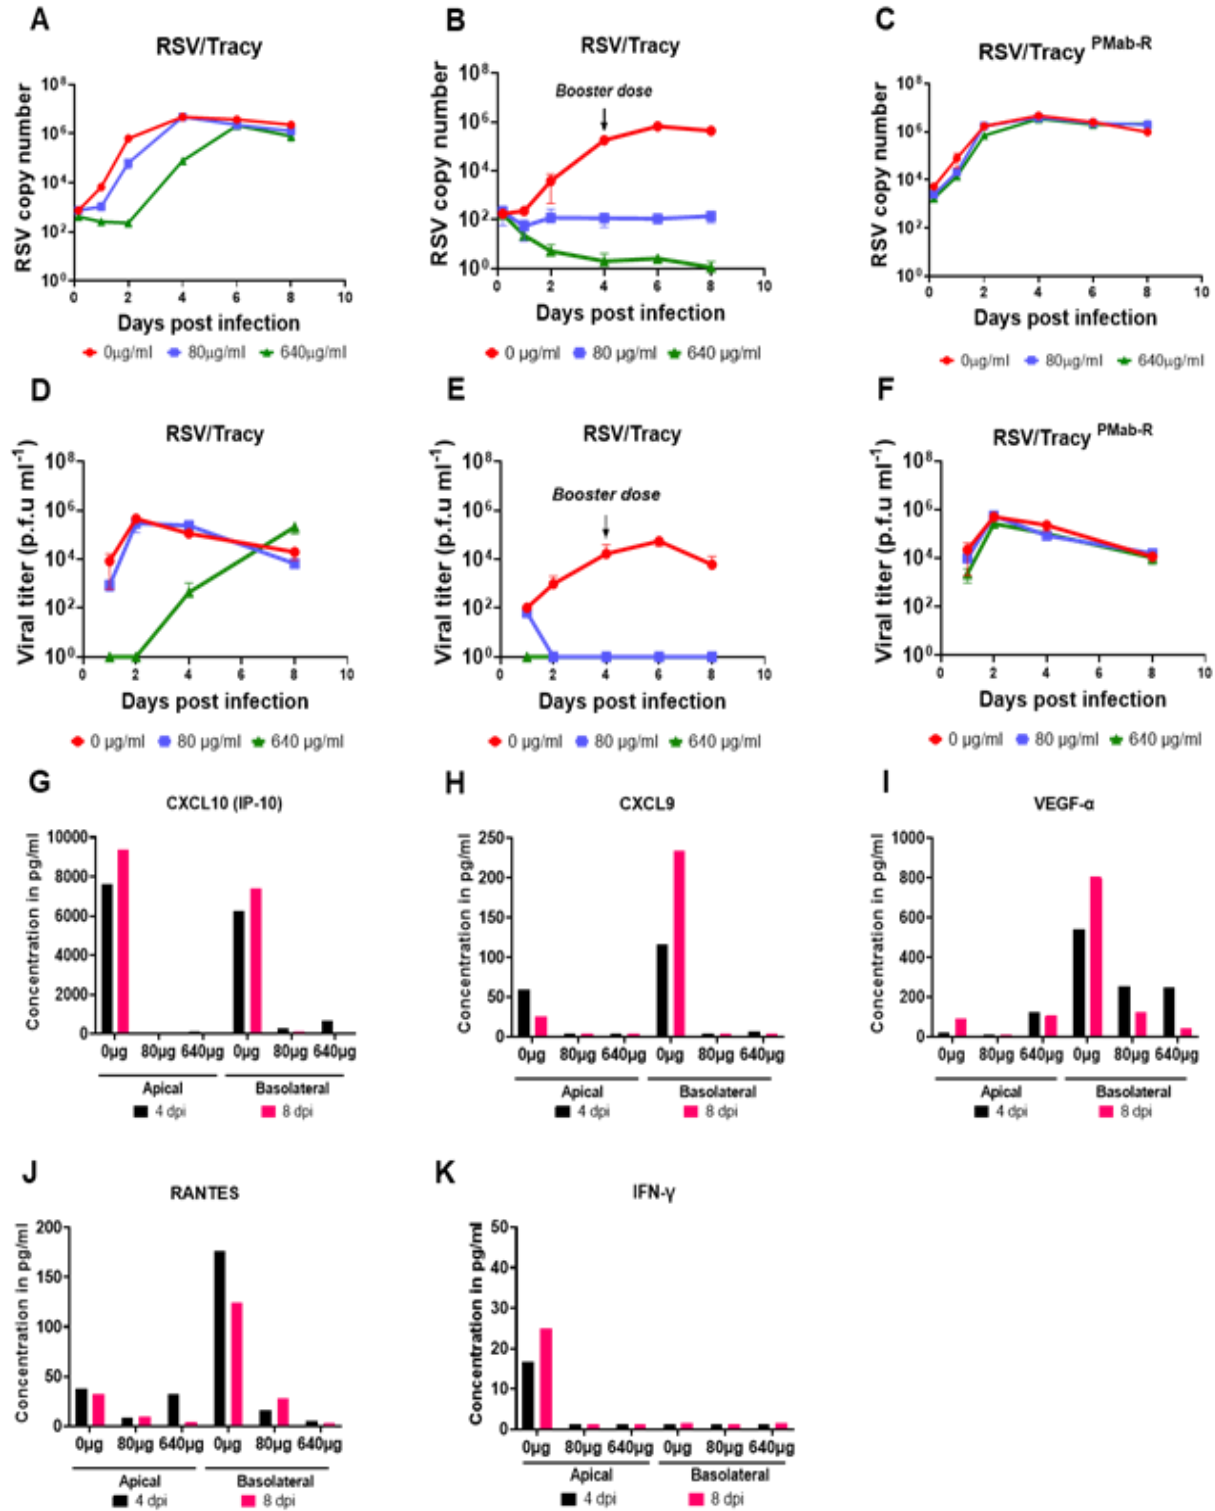

501

502

503 **Supplemental Figure 1:** List of ciliary epithelia associated genes in Human Nose Organoids  
504 (HNOs). Heatmap summarizes a list of expression of ciliary associated genes in undifferentiated  
505 3D AO cultures and 21-day differentiated ALI cultures. This is suggestive of effective  
506 differentiation process inducing ciliogenesis and functional ciliary movements in HNO-ALI  
507 cultures.

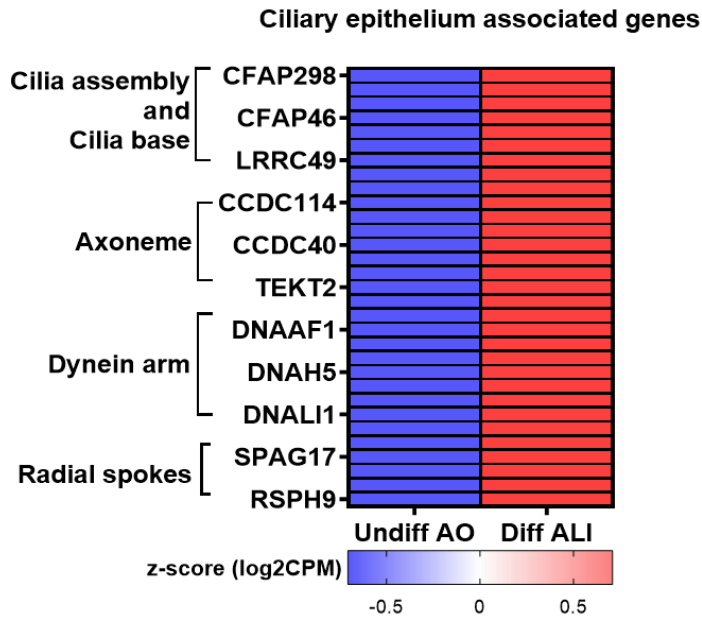

508

509 **Supplemental Figure 2:** Histological characterization of Human Nose Organoids (HNOs)  
510 infected with respiratory viruses: RSV/A/Ontario (ON), RSV/B/Buenos Aires (BA) and Severe  
511 Acute Respiratory Syndrome Coronavirus-2 (SARS-CoV-2).

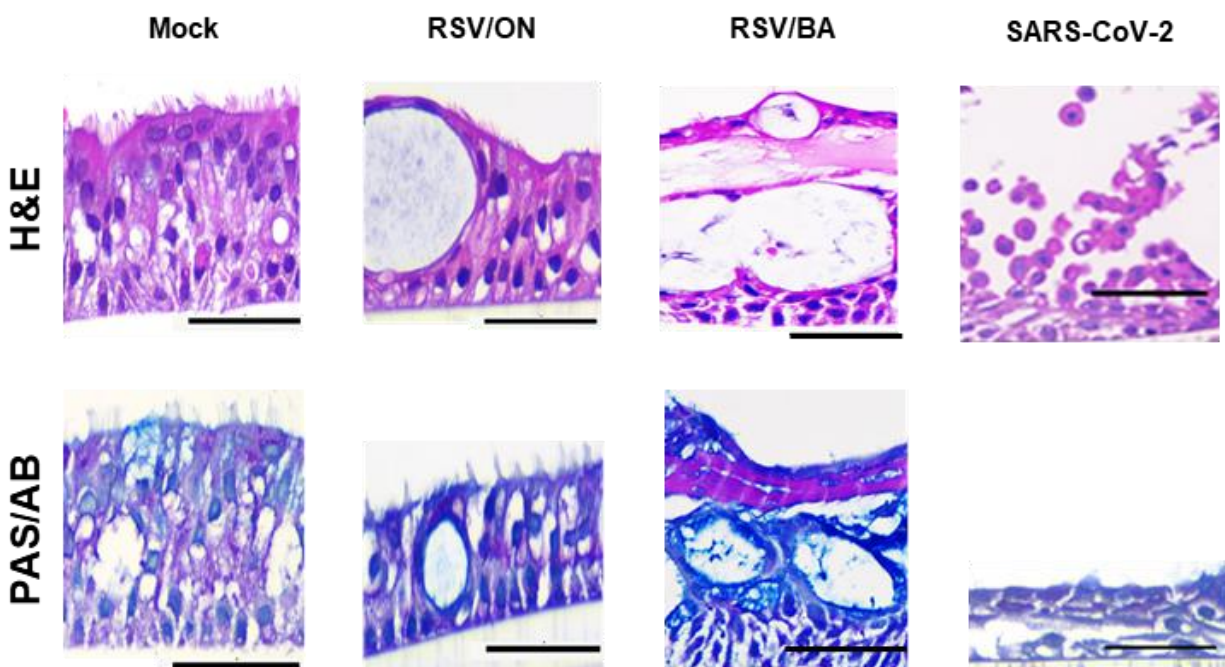

512

513 **Supplemental Figure 3:** Human Nose Organoid-Air Liquid Interface (HNO-ALI) infection and  
514 airway challenge model.

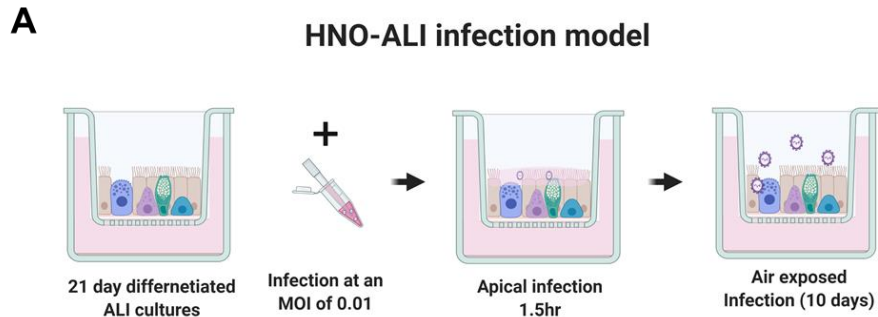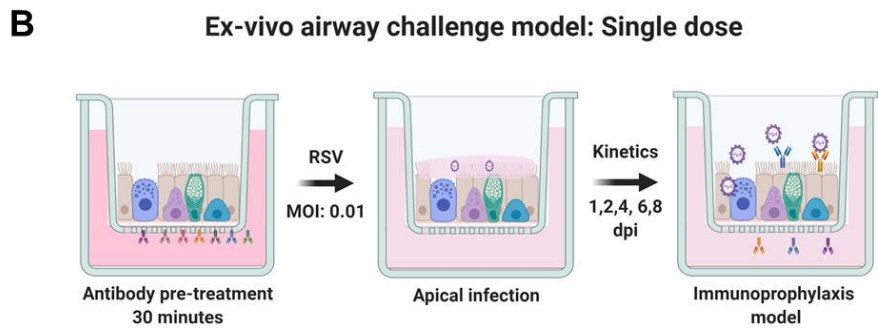

**Ex-vivo airway challenge model: Two dose**

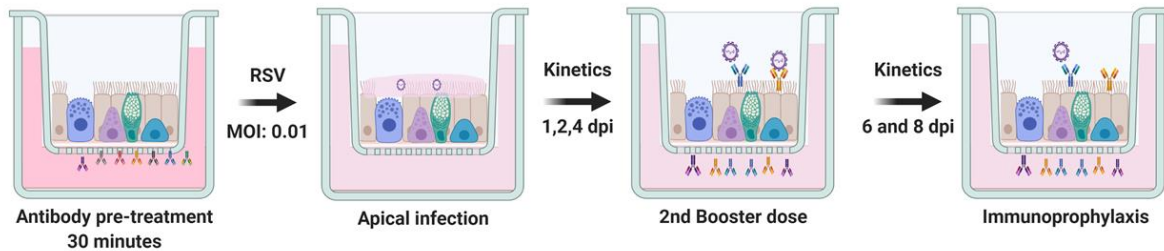

515

516 **Supplemental Table 1: Airway Organoid (AO) medium composition.**

| Media component                       | Supplier   | Catalogue number | Final concentration                              |
|---------------------------------------|------------|------------------|--------------------------------------------------|
| <b>R-Spondin 1 conditioned medium</b> |            |                  | 10%                                              |
| <b>FGF 7</b>                          | Peprtech   | 100-19           | 25 ng·ml <sup>-1</sup>                           |
| <b>FGF 10</b>                         | Peprtech   | 100-26           | 100 ng·ml <sup>-1</sup>                          |
| <b>Noggin conditioned medium</b>      |            |                  | 10%                                              |
| <b>A83-01</b>                         | Tocris     | 2939             | 500 nM                                           |
| <b>Y-27632</b>                        | Abmole     | Y-27632          | 5 µM                                             |
| <b>SB202190</b>                       | Sigma      | S7067            | 500 nM                                           |
| <b>B27 supplement</b>                 | Gibco      | 17504-44         | 1x                                               |
| <b>N-Acetylcysteine</b>               | Sigma      | A9165-5g         | 1.25 mM                                          |
| <b>Nicotinamide</b>                   | Sigma      | N0636            | 5 mM                                             |
| <b>GlutaMax 100x</b>                  | Invitrogen | 12634-034        | 1x                                               |
| <b>Hepes</b>                          | Invitrogen | 15630-056        | 10 mM                                            |
| <b>Penicillin / Streptomycin</b>      | Invitrogen | 15140-122        | 100 U·ml <sup>-1</sup> / 100 µg·ml <sup>-1</sup> |
| <b>Primocin</b>                       | Invivogen  | Ant-pm-1         | 50 µg·ml <sup>-1</sup>                           |
| <b>Advanced DMEM/F12</b>              | Invitrogen | 12634-034        | 1x                                               |

518 **References:**

- 519 1. van der Vaart, J. and H. Clevers, *Airway organoids as models of human disease*. Journal of  
520 Internal Medicine. **n/a**(n/a).
- 521 2. Tadokoro, T., et al., *IL-6/STAT3 promotes regeneration of airway ciliated cells from basal stem*  
522 *cells*. Proceedings of the National Academy of Sciences, 2014. **111**(35): p. E3641.
- 523 3. Tadokoro, T., et al., *BMP signaling and cellular dynamics during regeneration of airway*  
524 *epithelium from basal progenitors*. Development, 2016. **143**(5): p. 764-73.
- 525 4. Dye, B.R., et al., *In vitro generation of human pluripotent stem cell derived lung organoids*. eLife,  
526 2015. **4**: p. e05098.
- 527 5. Chen, Y.-W., et al., *A three-dimensional model of human lung development and disease from*  
528 *pluripotent stem cells*. Nature Cell Biology, 2017. **19**(5): p. 542-549.
- 529 6. Huang, S.X., et al., *Efficient generation of lung and airway epithelial cells from human pluripotent*  
530 *stem cells*. Nat Biotechnol, 2014. **32**(1): p. 84-91.
- 531 7. Sachs, N., et al., *Long-term expanding human airway organoids for disease modeling*. Embo j,  
532 2019. **38**(4).
- 533 8. Brewington, J.J., et al., *Detection of CFTR function and modulation in primary human nasal cell*  
534 *spheroids*. J Cyst Fibros, 2018. **17**(1): p. 26-33.
- 535 9. Gamage, A.M., et al., *Infection of human Nasal Epithelial Cells with SARS-CoV-2 and a 382-nt*  
536 *deletion isolate lacking ORF8 reveals similar viral kinetics and host transcriptional profiles*. PLoS  
537 Pathog, 2020. **16**(12): p. e1009130.
- 538 10. Nair, H., et al., *Global burden of acute lower respiratory infections due to respiratory syncytial*  
539 *virus in young children: a systematic review and meta-analysis*. Lancet, 2010. **375**(9725): p.  
540 1545-55.
- 541 11. Shi, T., et al., *Global, regional, and national disease burden estimates of acute lower respiratory*  
542 *infections due to respiratory syncytial virus in young children in 2015: a systematic review and*  
543 *modelling study*. The Lancet, 2017. **390**(10098): p. 946-958.
- 544 12. Welliver, T.P., et al., *Severe human lower respiratory tract illness caused by respiratory syncytial*  
545 *virus and influenza virus is characterized by the absence of pulmonary cytotoxic lymphocyte*  
546 *responses*. J Infect Dis, 2007. **195**(8): p. 1126-36.
- 547 13. Hall, C.B., *The burgeoning burden of respiratory syncytial virus among children*. Infect Disord  
548 Drug Targets, 2012. **12**(2): p. 92-7.
- 549 14. Falsey, A.R., et al., *Respiratory syncytial virus infection in elderly and high-risk adults*. N Engl J  
550 Med, 2005. **352**(17): p. 1749-59.
- 551 15. Dong, E., H. Du, and L. Gardner, *An interactive web-based dashboard to track COVID-19 in real*  
552 *time*. The Lancet Infectious Diseases, 2020. **20**(5): p. 533-534.
- 553 16. Vázquez, Y., et al., *Cytokines in the Respiratory Airway as Biomarkers of Severity and Prognosis*  
554 *for Respiratory Syncytial Virus Infection: An Update*. Frontiers in Immunology, 2019. **10**(1154).
- 555 17. Chen, Y., et al., *IP-10 and MCP-1 as biomarkers associated with disease severity of COVID-19*.  
556 Molecular Medicine, 2020. **26**(1): p. 97.
- 557 18. Ueland, T., et al., *Distinct and early increase in circulating MMP-9 in COVID-19 patients with*  
558 *respiratory failure*. J Infect, 2020. **81**(3): p. e41-e43.
- 559 19. Dabo, A.J., et al., *Matrix Metalloproteinase 9 Exerts Antiviral Activity against Respiratory*  
560 *Syncytial Virus*. PLOS ONE, 2015. **10**(8): p. e0135970.
- 561 20. Guiot, J., et al., *Blood Biomarkers in Idiopathic Pulmonary Fibrosis*. Lung, 2017. **195**(3): p. 273-  
562 280.



- 563 21. Zhang, A.J., et al., *Severe Acute Respiratory Syndrome Coronavirus 2 Infects and Damages the*  
564 *Mature and Immature Olfactory Sensory Neurons of Hamsters*. *Clinical Infectious Diseases*, 2020.
- 565 22. Williamson, B.N., et al., *Clinical benefit of remdesivir in rhesus macaques infected with SARS-*  
566 *CoV-2*. *Nature*, 2020. **585**(7824): p. 273-276.
- 567 23. Richard, M., et al., *SARS-CoV-2 is transmitted via contact and via the air between ferrets*. *Nat*  
568 *Commun*, 2020. **11**(1): p. 3496.
- 569 24. Johansen, M.D., et al., *Animal and translational models of SARS-CoV-2 infection and COVID-19*.  
570 *Mucosal Immunology*, 2020. **13**(6): p. 877-891.
- 571 25. Taylor, G., *Animal models of respiratory syncytial virus infection*. *Vaccine*, 2017. **35**(3): p. 469-  
572 480.
- 573 26. Bem, R.A., J.B. Domachowske, and H.F. Rosenberg, *Animal models of human respiratory*  
574 *syncytial virus disease*. *American Journal of Physiology-Lung Cellular and Molecular Physiology*,  
575 2011. **301**(2): p. L148-L156.
- 576 27. Mulay, A., et al., *SARS-CoV-2 infection of primary human lung epithelium for COVID-19 modeling*  
577 *and drug discovery*. *bioRxiv*, 2020.
- 578 28. Lamers, M.M., et al., *An organoid-derived bronchioalveolar model for SARS-CoV-2 infection of*  
579 *human alveolar type II-like cells*. *The EMBO Journal*, 2021. **40**(5): p. e105912.
- 580 29. *Updated guidance for palivizumab prophylaxis among infants and young children at increased*  
581 *risk of hospitalization for respiratory syncytial virus infection*. *Pediatrics*, 2014. **134**(2): p. e620-  
582 38.
- 583 30. Subramanian, K.N., et al., *Safety, tolerance and pharmacokinetics of a humanized monoclonal*  
584 *antibody to respiratory syncytial virus in premature infants and infants with bronchopulmonary*  
585 *dysplasia*. *MEDI-493 Study Group*. *Pediatr Infect Dis J*, 1998. **17**(2): p. 110-5.
- 586 31. Gilbert, B.E., et al., *Respiratory syncytial virus fusion nanoparticle vaccine immune responses*  
587 *target multiple neutralizing epitopes that contribute to protection against wild-type and*  
588 *palivizumab-resistant mutant virus challenge*. *Vaccine*, 2018. **36**(52): p. 8069-8078.
- 589 32. Benali, R., et al., *Tubule formation by human surface respiratory epithelial cells cultured in a*  
590 *three-dimensional collagen lattice*. *Am J Physiol*, 1993. **264**(2 Pt 1): p. L183-92.
- 591 33. Jiang, D., N. Schaefer, and H.W. Chu, *Air-Liquid Interface Culture of Human and Mouse Airway*  
592 *Epithelial Cells*. *Methods Mol Biol*, 2018. **1809**: p. 91-109.
- 593 34. Zhou, J., et al., *Differentiated human airway organoids to assess infectivity of emerging influenza*  
594 *virus*. *Proceedings of the National Academy of Sciences*, 2018. **115**(26): p. 6822.
- 595 35. Gamage, A.M., et al., *Infection of human Nasal Epithelial Cells with SARS-CoV-2 and a 382-nt*  
596 *deletion isolate lacking ORF8 reveals similar viral kinetics and host transcriptional profiles*. *PLOS*  
597 *Pathogens*, 2020. **16**(12): p. e1009130.
- 598 36. Cao, H., et al., *Testing gene therapy vectors in human primary nasal epithelial cultures*.  
599 *Molecular Therapy - Methods & Clinical Development*, 2015. **2**.
- 600 37. Charles, D.D., et al., *Development of a Novel ex vivo Nasal Epithelial Cell Model Supporting*  
601 *Colonization With Human Nasal Microbiota*. *Frontiers in Cellular and Infection Microbiology*,  
602 2019. **9**(165).
- 603 38. Leung, C., et al., *Structural and functional variations in human bronchial epithelial cells cultured*  
604 *in air-liquid interface using different growth media*. *American Journal of Physiology-Lung Cellular*  
605 *and Molecular Physiology*, 2020. **318**(5): p. L1063-L1073.
- 606 39. Au - Müller, L., et al., *Culturing of Human Nasal Epithelial Cells at the Air Liquid Interface*. *JoVE*,  
607 2013(80): p. e50646.
- 608 40. Lamers, M.M., et al., *SARS-CoV-2 productively infects human gut enterocytes*. *Science*, 2020.  
609 **369**(6499): p. 50.

- 610 41. Freeman, M.C., et al., *Respiratory and intestinal epithelial cells exhibit differential susceptibility*  
611 *and innate immune responses to contemporary EV-D68 isolates*. bioRxiv, 2021: p.  
612 2021.01.05.425225.
- 613 42. Zhang, L., et al., *Respiratory syncytial virus infection of human airway epithelial cells is polarized,*  
614 *specific to ciliated cells, and without obvious cytopathology*. J Virol, 2002. **76**(11): p. 5654-66.
- 615 43. Villenave, R., et al., *In vitro modeling of respiratory syncytial virus infection of pediatric bronchial*  
616 *epithelium, the primary target of infection in vivo*. Proceedings of the National Academy of  
617 Sciences of the United States of America, 2012. **109**(13): p. 5040-5045.
- 618 44. Rijsbergen, L.C., et al., *Human Respiratory Syncytial Virus Subgroup A and B Infections in Nasal,*  
619 *Bronchial, Small-Airway, and Organoid-Derived Respiratory Cultures*. mSphere, 2021. **6**(3).
- 620 45. Persson, B.D., et al., *Respiratory Syncytial Virus Can Infect Basal Cells and Alter Human Airway*  
621 *Epithelial Differentiation*. PLOS ONE, 2014. **9**(7): p. e102368.
- 622 46. Nicholson, E.G., et al., *Robust Cytokine and Chemokine Response in Nasopharyngeal Secretions:*  
623 *Association With Decreased Severity in Children With Physician Diagnosed Bronchiolitis*. The  
624 Journal of Infectious Diseases, 2016. **214**(4): p. 649-655.
- 625 47. Sung, R.Y., et al., *A comparison of cytokine responses in respiratory syncytial virus and influenza*  
626 *A infections in infants*. Eur J Pediatr, 2001. **160**(2): p. 117-22.
- 627 48. Rajan, A., et al., *Multiple RSV strains infecting HEp-2 and A549 cells reveal cell line-dependent*  
628 *differences in resistance to RSV infection*. bioRxiv, 2021: p. 2021.06.15.448622.
- 629 49. Lambkin-Williams, R., et al., *The human viral challenge model: accelerating the evaluation of*  
630 *respiratory antivirals, vaccines and novel diagnostics*. Respiratory Research, 2018. **19**(1): p. 123.
- 631 50. Groothuis, J.R., et al., *Prophylactic Administration of Respiratory Syncytial Virus Immune Globulin*  
632 *to High-Risk Infants and Young Children*. New England Journal of Medicine, 1993. **329**(21): p.  
633 1524-1530.
- 634 51. Siber, G.R., et al., *Comparison of antibody concentrations and protective activity of respiratory*  
635 *syncytial virus immune globulin and conventional immune globulin*. J Infect Dis, 1994. **169**(6): p.  
636 1368-73.
- 637 52. Group, T.I.-R.S., *Palivizumab, a Humanized Respiratory Syncytial Virus Monoclonal Antibody,*  
638 *Reduces Hospitalization From Respiratory Syncytial Virus Infection in High-risk Infants*. Pediatrics,  
639 1998. **102**(3): p. 531-537.
- 640 53. Neuberger, T., et al., *Use of primary cultures of human bronchial epithelial cells isolated from*  
641 *cystic fibrosis patients for the pre-clinical testing of CFTR modulators*. Methods Mol Biol, 2011.  
642 **741**: p. 39-54.
- 643 54. Poole, N.M., A. Rajan, and A.W. Maresso, *Human Intestinal Enteroids for the Study of Bacterial*  
644 *Adherence, Invasion, and Translocation*. Curr Protoc Microbiol, 2018. **50**(1): p. e55.
- 645 55. Saxena, K., et al., *Human Intestinal Enteroids: a New Model To Study Human Rotavirus Infection,*  
646 *Host Restriction, and Pathophysiology*. Journal of Virology, 2016. **90**(1): p. 43-56.
- 647 56. Rajan, A., et al., *Novel Segment- and Host-Specific Patterns of Enterogastric *Escherichia**  
648 *coli* Adherence to Human Intestinal Enteroids. mBio, 2018. **9**(1): p. e02419-17.
- 649 57. Avadhanula, V., et al., *Infection With Novel Respiratory Syncytial Virus Genotype Ontario (ON1)*  
650 *in Adult Hematopoietic Cell Transplant Recipients, Texas, 2011-2013*. The Journal of Infectious  
651 Diseases, 2015. **211**(4): p. 582-589.
- 652 58. Avadhanula, V., et al., *Viral load of SARS-CoV-2 in adults during the first and second wave of*  
653 *COVID-19 pandemic in Houston, TX: the potential of the super-spreader*. J Infect Dis, 2021.
- 654 59. Englund, J.A., et al., *Rapid diagnosis of respiratory syncytial virus infections in*  
655 *immunocompromised adults*. J Clin Microbiol, 1996. **34**(7): p. 1649-53.

- 656 60. Shi, S.R., et al., *Antigen retrieval technique utilizing citrate buffer or urea solution for*  
657 *immunohistochemical demonstration of androgen receptor in formalin-fixed paraffin sections.* J  
658 *Histochem Cytochem*, 1993. **41**(11): p. 1599-604.  
659
